# Adrenal Steroid Regulation of Neurotrophic Factor Expression in the Rat Hippocampus

HELEN M. CHAO, RANDALL R. SAKAI, LI YUN MA, AND BRUCE S. McEWEN

*The Rockefeller University (H.M.C., B.S.M.), Laboratory of Neuroendocrinology, New York, New York 10021; University of Pennsylvania (R.R.S., L.Y.M.), Department of Animal Biology, Philadelphia, Pennsylvania 19104*

## ABSTRACT

Adrenal steroids and neurotrophic factors are important modulators of neuronal plasticity, function, and survival in the rat hippocampus. Adrenal steroids act through two receptor subtypes, the glucocorticoid receptor (GR) and the mineralocorticoid receptor, and activation of each receptor subtype has distinct biochemical and physiological consequences. Adrenal steroids may exert their effects on neuronal structure and function through the regulation of expression of neurotrophic and growth-associated factors. We have examined adrenal steroid regulation of the neurotrophins brain-derived neurotrophic factor, neurotrophin-3, and basic fibroblast growth factor, as well as the growth associated protein GAP-43, through activation of

GR or mineralocorticoid receptor with selective agonists. Our findings indicated that in CA2 pyramidal cells, adrenalectomy resulted in decreases in the levels of basic fibroblast growth factor and neurotrophin-3 messenger RNA, which were prevented by activation of mineralocorticoid but not glucocorticoid receptors. Adrenalectomy-induced increases in GAP-43 and brain-derived neurotrophic factor messenger RNA levels could be blocked by activation of glucocorticoid receptors in CA1, but not in CA3, pyramidal cells. Thus the extent to which adrenal steroids regulate hippocampal neurotrophic and growth-associated factors, appears to be dependent both on the adrenal steroid receptor subtype activated and on the hippocampal subregion examined. (*Endocrinology* **139**: 3112–3118, 1998)

A VARIETY of neurotrophic factors, including brain-derived neurotrophic factor (BDNF), neurotrophin-3 (NT-3), and basic fibroblast growth factor (bFGF), have been shown to play important roles in regulating the plasticity and function of hippocampal neurons (1–6). In the hippocampus, the expression of the neurotrophins BDNF, NT-3, and bFGF as well as the receptors to which they bind (trkB, trkC, and FGFR, respectively), suggests that these factors may act locally through autocrine mechanisms to exert their neuromodulatory and protective effects (7–13).

Adrenal steroids have a multitude of effects on the structure, function, and survival of hippocampal neurons (14–16). The hippocampus is particularly sensitive to adrenal steroid action due to the prominence in this brain region of two distinct receptor subtypes, the mineralocorticoid receptor (MR or type I receptor), and the glucocorticoid receptor (GR or type II receptor). The mineralocorticoid receptor has a high affinity for corticosterone and aldosterone (17, 18), and, within the hippocampus, is most abundant in CA2 pyramidal cells with moderate levels expressed in the other hippocampal subfields (19–21). The glucocorticoid receptor has a lower affinity for aldosterone but a higher affinity for synthetic agonists such as dexamethasone and RU28362 than MR (22, 23). In the hippocampus, the level of GR expression is highest in the CA1 subfield, lowest in the CA3 subregion, and intermediate in the dentate gyrus (20, 21, 24).

For many of the electrophysiological, biochemical, and morphological effects of adrenal steroids on hippocampal neurons, there are markedly different consequences to acti-

vation of one adrenal steroid receptor subtype or the other (14, 16). These effects of glucocorticoids on neuronal structure and function, may be mediated through their actions as transcriptional regulators of target genes such as the growth-associated protein GAP-43, whose expression is closely correlated with axonal growth and neuronal plasticity (25–27), or the neurotrophic factors BDNF, NT-3, or bFGF. To investigate this putative mechanism of action, we have examined the ability of ligands specific for each adrenal steroid receptor subtype, to regulate the expression of GAP-43 and the neurotrophic factors BDNF, NT-3 and bFGF, in the different subregions of the rat hippocampus.

## Materials and Methods

### Experimental animals

Adult male Sprague-Dawley rats (CD strain, Harlan, Indianapolis, IN) were maintained on a 12-h dark, 12-h light cycle and had access to both water and 0.5 M NaCl from 7 days before surgery, until animals were euthanized.

*Exp 1.* Animals were (1) sham-operated and implanted with mock minipumps (Sham); (2) adrenalectomized and implanted with mock minipumps (adrenalectomy, ADX); (3) ADX and implanted with Alzet no. 2001 minipumps delivering aldosterone at 1  $\mu\text{g}/\text{h}$  (ADX + Aldo); (4) ADX and implanted with minipumps delivering corticosterone at 10  $\mu\text{g}/\text{h}$  (ADX + CORT);  $n = 5$ –6 per treatment group. Daily fluid intakes were monitored following surgery. Animals were euthanized 7 days after surgery, and brains and trunk blood were collected. Plasma corticosterone levels were assessed by RIA. Daily fluid intakes and plasma corticosterone levels were previously reported (28).

*Exp 2.* Animals were (1) sham-operated and implanted with mock minipumps (Sham); (2) adrenalectomized and implanted with mock minipumps (ADX); (3) ADX and implanted with Alzet no. 2001 minipumps delivering aldosterone at 1  $\mu\text{g}/\text{h}$  (ADX + Aldo); (4) ADX and implanted with minipumps delivering RU28362 at 10  $\mu\text{g}/\text{h}$  (ADX + RU); and (5) ADX and implanted with minipumps delivering aldosterone at 1  $\mu\text{g}/\text{h}$  and RU28362 at 10  $\mu\text{g}/\text{h}$  (ADX + Aldo + RU);  $n =$

Received December 23, 1997.

Address all correspondence and requests for reprints to: Helen M. Chao, The Rockefeller University, 1230 York Avenue, Box 165, New York, New York 10021. E-mail: chaoh@rockvax.rockefeller.edu.

FIG. 1. Hippocampal BDNF mRNA expression in Exp 1. Levels of BDNF mRNA expression were assessed in the CA1 pyramidal cell layer (CA1), CA3 pyramidal cell layer (CA3), and granule cell layer of the dentate gyrus (DG). Statistical analysis indicated that the ADX animals were significantly different from the Sham animals in the CA3 sub-region (\*,  $P < 0.05$ ).

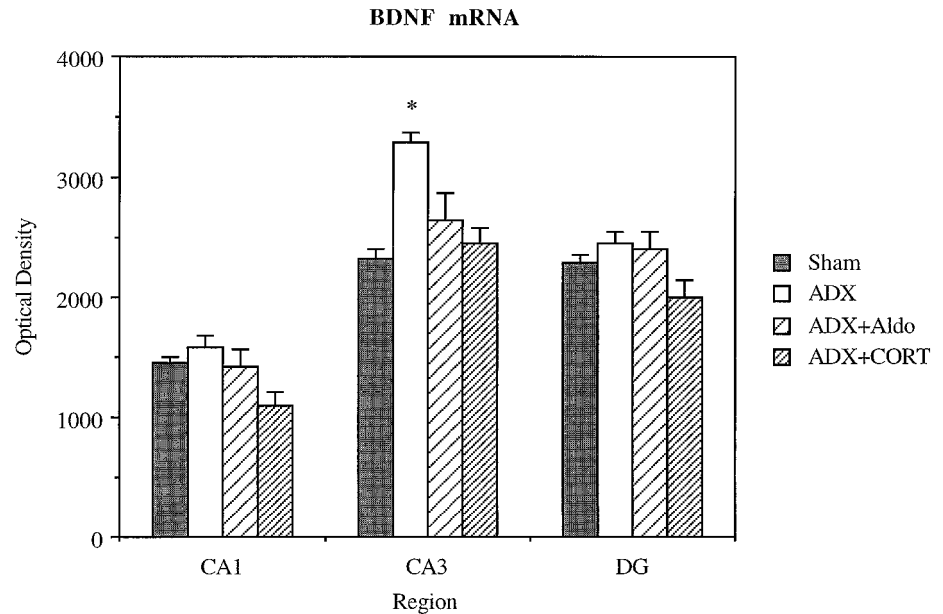

FIG. 2. Hippocampal NT-3 mRNA expression in Exp 1. Levels of NT-3 mRNA expression were assessed in the CA1 pyramidal cell layer (CA1), CA2 pyramidal cell layer (CA2), CA3 pyramidal cell layer (CA3), and granule cell layer of the dentate gyrus (DG). Statistical analysis indicated that the ADX and the ADX + Aldo animals were significantly different from the Sham animals in the CA2 subregion (\*,  $P < 0.05$ ).

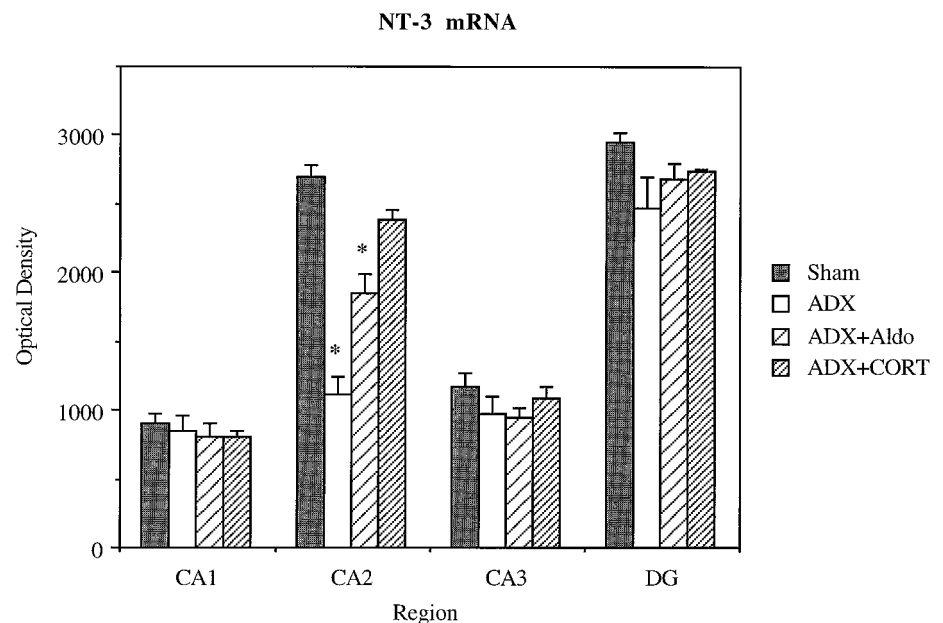

5–6 per treatment group. Daily fluid intakes were monitored and animals exhibiting aberrant intake levels were eliminated from the study. Seven days after surgery, body weights were recorded, animals were euthanized, and brains and trunk blood were collected. Plasma corticosterone and aldosterone levels were assessed by RIA. Daily fluid intakes, body weights, and plasma steroid levels were previously reported (28).

#### *In situ hybridization*

Brains were removed, immediately frozen, and stored at  $-70^{\circ}\text{C}$ . Sixteen-micron sections were prepared on a cryostat microtome, collected on gelatin-coated slides, and stored frozen until hybridization. Before hybridization, sections were fixed in 4% formaldehyde in PBS, acetylated in a solution of 0.25% acetic anhydride in 0.1 M triethanolamine-HCl, pH 8.0, rinsed in  $2 \times \text{SSC}$ , and allowed to air-dry. Antisense riboprobes radioactively labeled with  $^{35}\text{S}$  were transcribed from complementary DNA clones corresponding to BDNF (29), NT-3

(30), bFGF (31), and GAP-43 (32). The hybridization mix (50% formamide; 10% dextran sulfate; 600 mM NaCl;  $1 \times \text{Denhardt's solution}$ ; 10 mM Tris-HCl, pH 7.5; 1 mM EDTA, pH 8; 100  $\mu\text{g/ml}$  denatured salmon testis DNA; 10 mM dithiothreitol; radiolabeled probe) was added at 0.2 ml per slide, the slides were coverslipped, and the sections were incubated overnight at  $55^{\circ}\text{C}$ . Following hybridization, the coverslips were removed, and the sections were rinsed in  $2 \times \text{SSC}$ . The sections were treated with 10  $\mu\text{g/ml}$  RNase A, washed in RNase A buffer and in  $2 \times \text{SSC}$  at room temperature, followed by  $0.5 \times \text{SSC}$  at  $55^{\circ}\text{C}$ . The sections were allowed to air dry and then were apposed to x-ray film for autoradiography.

The optical densities of the autoradiographic images were determined on the Imaging Research image analysis system. The value of the low hybridization signal in the medial aspect of cortical layer 1 was taken (by definition) as background and subtracted from the optical density values for the hippocampal cell layers. The data were expressed as optical density (means  $\pm$  SEM). Statistical analysis was by one-way

FIG. 3. Hippocampal bFGF mRNA expression in Exp 1. Levels of bFGF mRNA expression were assessed in the CA1 pyramidal cell layer (CA1), CA2 pyramidal cell layer (CA2), CA3 pyramidal cell layer (CA3), and granule cell layer of the dentate gyrus (DG). Statistical analysis indicated that the ADX and the ADX + Aldo animals were significantly different from the Sham animals in the CA2 subregion (\*,  $P < 0.05$ ).

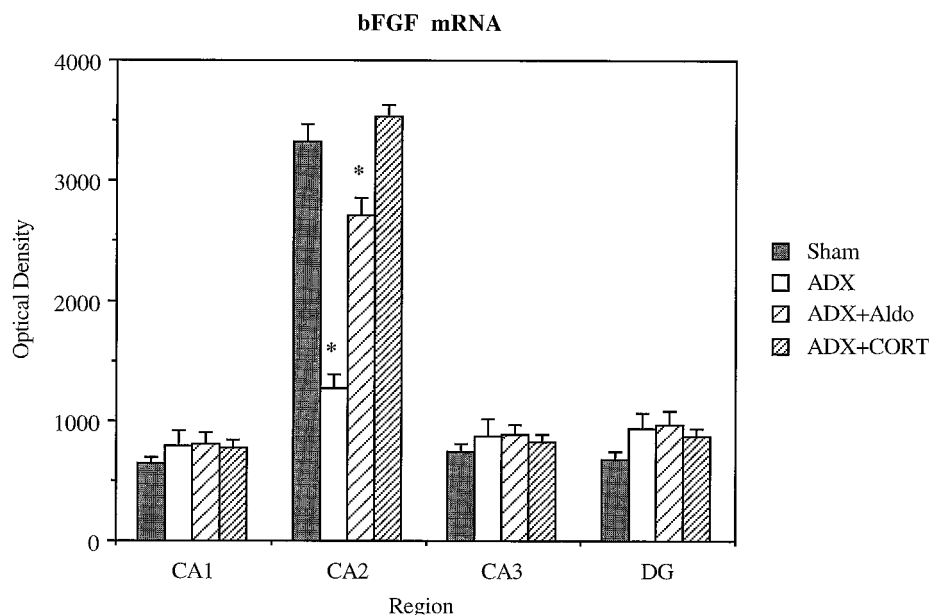

FIG. 4. Hippocampal GAP-43 mRNA expression in Exp 1. Levels of GAP-43 mRNA expression were assessed in the CA1 pyramidal cell layer (CA1) and CA3 pyramidal cell layer (CA3). Statistical analysis indicated that the ADX animals were significantly different from the Sham animals in the CA1 and CA3 subregions (\*,  $P < 0.05$ ).

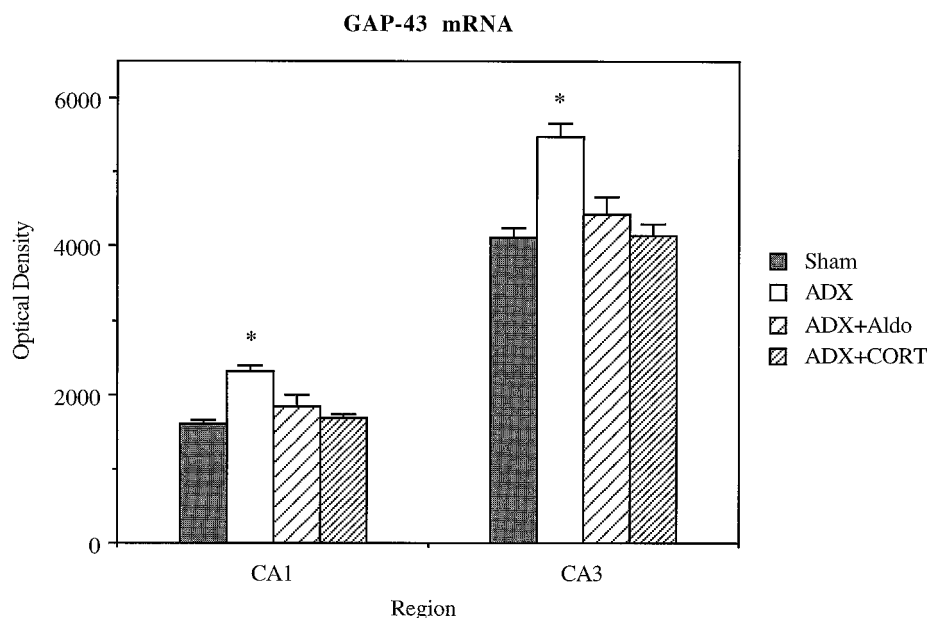

ANOVA followed by Tukey's posthoc test, with  $P < 0.05$  as the criterion for statistical significance.

## Results

### Exp 1: steroid replacement of adrenalectomized animals with aldosterone or corticosterone

In the adrenalectomized animals there was a significant induction in BDNF messenger RNA (mRNA) expression in the CA3 subfield, relative to the Sham animals. This increase was prevented by treatment of the ADX animals with either aldosterone or corticosterone (Fig. 1).

Adrenalectomy resulted in a significant decrease in the level of NT-3 mRNA in CA2 pyramidal cells, relative to Sham animals. The expression of NT-3 mRNA in the CA2 subregion was markedly increased in ADX animals receiving al-

dosterone or corticosterone treatment, compared with the untreated ADX group (Fig. 2). Expression of bFGF mRNA in the CA2 subregion showed this same pattern of adrenal steroid regulation (Fig. 3).

The expression of GAP-43 mRNA was increased by adrenalectomy in the CA1 and CA3 hippocampal subregions, relative to the Sham animals. This induction was prevented by treatment of the ADX animals with either aldosterone or corticosterone (Fig. 4).

### Exp 2: steroid replacement of adrenalectomized animals with aldosterone and/or RU28362

Adrenalectomy caused a significant increase in the expression of BDNF mRNA in pyramidal cells, relative to Sham animals, with no change observed in the granule cells of the

FIG. 5. Hippocampal BDNF mRNA expression in Exp 2. Levels of BDNF mRNA expression were assessed in the CA1 pyramidal cell layer (CA1), CA3 pyramidal cell layer (CA3), and granule cell layer of the dentate gyrus (DG). Statistical analysis indicated that the ADX animals were significantly different from the Sham animals in the CA1 subregion, and that the ADX and the ADX + RU animals were significantly different from the Sham animals in the CA3 subregion (\*,  $P < 0.05$ ).

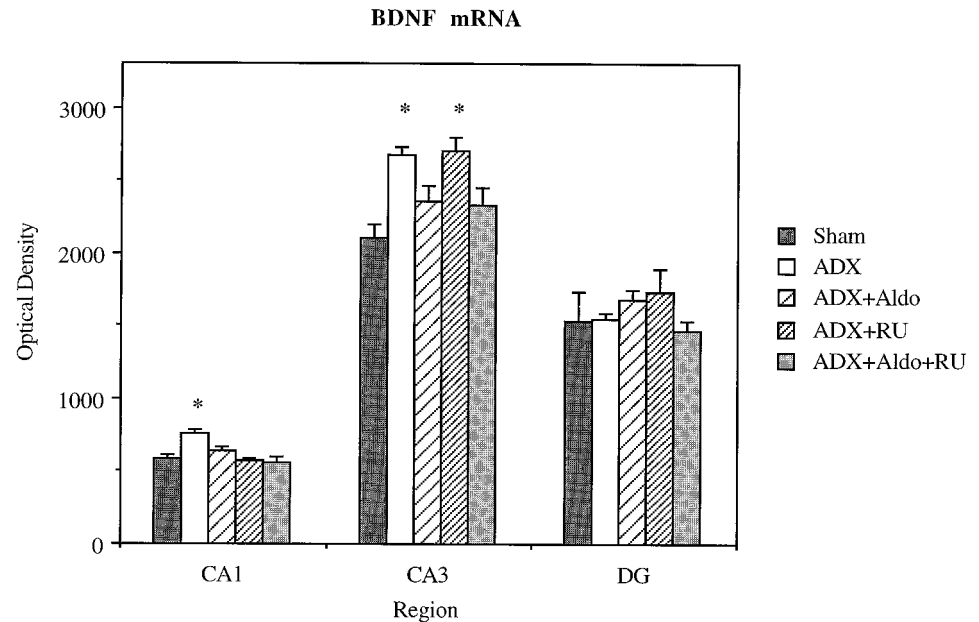

FIG. 6. Hippocampal NT-3 mRNA expression in Exp 2. Levels of NT-3 mRNA expression were assessed in the CA1 pyramidal cell layer (CA1), CA2 pyramidal cell layer (CA2), CA3 pyramidal cell layer (CA3), and granule cell layer of the dentate gyrus (DG). Statistical analysis indicated that the ADX and the ADX + RU animals were significantly different from the Sham animals in the CA2 subregion (\*,  $P < 0.05$ ).

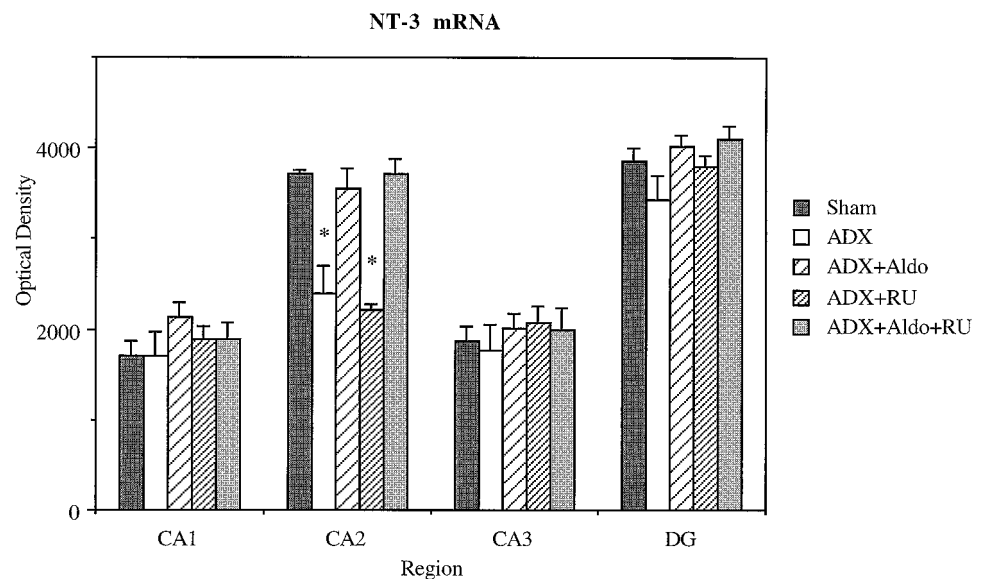

dentate gyrus. In the CA1 subregion, but not in CA3 pyramidal cells, this induction was prevented by treatment of the ADX animals with the GR-specific agonist RU28362, in the presence or absence of aldosterone (Fig. 5).

In the adrenalectomized animals there was a significant decrease in NT-3 mRNA expression in the CA2 subfield, relative to the Sham animals. This decrease was prevented by treatment of the ADX animals with the MR-specific agonist aldosterone, in the presence or absence of RU28362, but not by RU28362 alone (Fig. 6). Expression of bFGF mRNA in the CA2 subregion showed this same pattern of adrenal steroid regulation (Fig. 7).

GAP-43 mRNA levels were elevated in ADX animals, in CA1 and CA3 pyramidal cells, relative to the Sham animals. In CA1, but not in CA3, pyramidal cells this induction was prevented by treatment of the ADX animals with RU28362.

In both CA1 and CA3 pyramidal cells, the combined treatment of ADX animals with aldosterone and RU28362 resulted in decreased expression of GAP-43 mRNA, compared with the untreated ADX group (Fig. 8).

### Discussion

The results of our studies have demonstrated that the profile for steroid-regulated neurotrophin expression is dependent upon the neurotrophic factor in question, the adrenal steroid receptor subtype activated, and the hippocampal subregion examined. A comparison of the results from the different hippocampal subfields demonstrates that despite the colocalization of GR and MR in hippocampal neurons (33, 34), there are distinct regulatory mechanisms mediated by either GR or MR activation. The changes we



FIG. 7. Hippocampal bFGF mRNA expression in Exp 2. Levels of bFGF mRNA expression were assessed in the CA1 pyramidal cell layer (CA1), CA2 pyramidal cell layer (CA2), CA3 pyramidal cell layer (CA3), and granule cell layer of the dentate gyrus (DG). Statistical analysis indicated that the ADX and the ADX + RU animals were significantly different from the Sham animals in the CA2 subregion (\*,  $P < 0.05$ ).

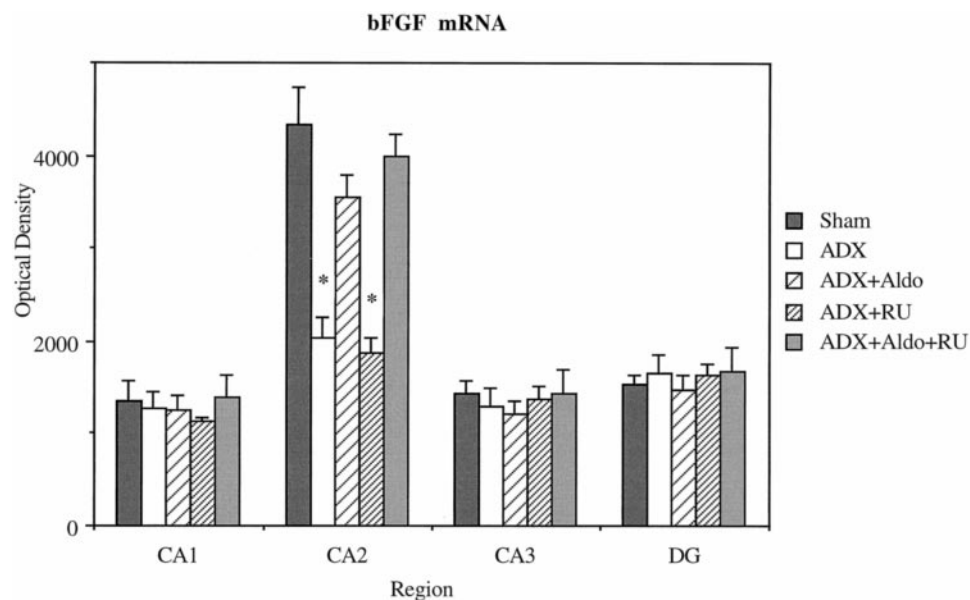

FIG. 8. Hippocampal GAP-43 mRNA expression in Exp 2. Levels of GAP-43 mRNA expression were assessed in the CA1 pyramidal cell layer (CA1) and CA3 pyramidal cell layer (CA3). Statistical analysis indicated that the ADX and the ADX + Aldo animals were significantly different from the Sham animals in the CA1 subregion and that the ADX animals were significantly different from the Sham animals in the CA3 subregion (\*,  $P < 0.05$ ).

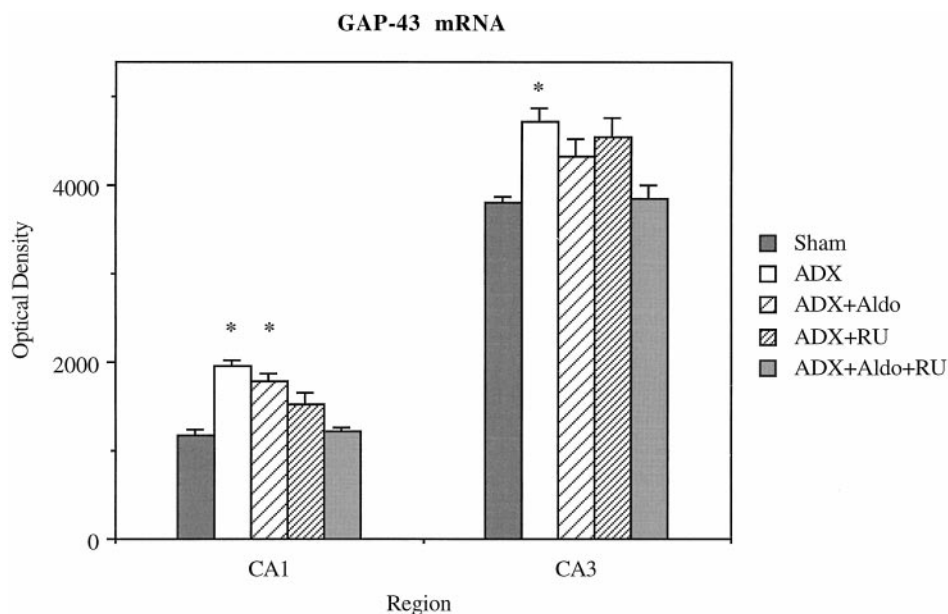

observed following adrenal steroid treatment were restricted to hippocampal pyramidal cells, and we found no evidence for regulation of neurotrophin expression in the granule cells of the dentate gyrus. Because adrenalectomy has been shown to result in granule cell death (35) the possibility remains that in measurements of the entire granule cell layer, neuronal loss could be obscuring increases in neurotrophin expression in the cells that survive, a question that might be resolved by single-cell analysis of neurotrophin expression.

In the CA3 pyramidal cells of the hippocampus, corticosterone treatment has been shown to cause dendritic atrophy and neuronal damage (36, 37). The increase in BDNF and GAP-43 mRNA expression observed following adrenalectomy suggests that these genes may be under tonic glucocorticoid inhibition and raises the possibility that prolonged

glucocorticoid excess could, through repression of such gene products, precipitate a neurodegenerative cascade. Different patterns of steroid-regulated gene expression are apparent when these results are compared with those of studies employing other regimens for sodium replacement following adrenalectomy and investigating different timepoints after surgery (38–40), suggesting that the changes in neurotrophin expression may be sensitive to salt and water homeostasis in addition to adrenal steroid levels, or that they may be transient.

The mRNAs for bFGF and NT-3 showed similar patterns of regulation by adrenal steroids. Adrenalectomy inhibited the expression of bFGF and NT-3 mRNAs in CA2 pyramidal neurons, in agreement with previous results (39–42). Activation by aldosterone of the mineralocorticoid receptor,

which is most highly expressed in the CA2 subregion, was effective in preventing this ADX-induced decrease in neurotrophin expression. While there is scant information on the function of the neurons in the CA2 subregion, the steroid regulation of bFGF and NT-3 in these cells may be of importance because the markedly high levels of expression of these neurotrophic factors could contribute to the resistance of CA2 pyramidal cells to damage in epilepsy (43, 44).

In CA1 pyramidal cells, we have found evidence that adrenalectomy results in an increase in the mRNAs for BDNF and GAP-43. Activation by RU28362 of the glucocorticoid receptor, which is most abundant in the CA1 subregion, can prevent this ADX-induced increase in expression. The finding that adrenalectomy induces growth factor expression is consistent with reports showing that CA1 pyramidal cells are protected from neurodegenerative, neurotoxic, and ischemic damage by adrenalectomy (45, 46). In addition, because there is a well documented reciprocal regulation of neurotrophins and neuronal signaling (3, 4), it is of interest to note that long-term potentiation (LTP), which is impaired in BDNF-deficient animals, can be restored by targeted reexpression of BDNF, and that activation of GR acts to inhibit both BDNF expression and LTP in CA1 neurons (14, 47–49).

In conclusion, adrenal steroids and neurotrophic factors have profound influences on the structure and activity of hippocampal neurons, and our results support the model that adrenal steroids exert their effects, at least in part, through regulation of neurotrophic factor expression. Our findings suggest that adrenal steroids, acting differentially through GR or MR, can elicit distinct patterns of neurotrophic factor expression in the various hippocampal subfields, with diverse consequences for neuronal morphology, function and survival.

### Acknowledgments

We thank Drs. A. Baird, G. Barbany, M. C. Fishman, and W. J. Friedman for generously providing complementary DNA clones and Roussel-Uclaf (Romainville, France) for the gift of RU28362.

### References

- Liu Z, D'Amore PA, Mikati M, Gatt A, Holmes GL 1993 Neuroprotective effect of chronic infusion of basic fibroblast growth factor on seizure-associated hippocampal damage. *Brain Res* 626:335–338
- Lindvall O, Kokaia Z, Bengzon J, Elmer E, Kokaia M 1994 Neurotrophins and brain insults. *Trends Neurosci* 17:490–496
- Lo DC 1995 Neurotrophic factors and synaptic plasticity. *Neuron* 15:979–981
- Thoenen H 1995 Neurotrophins and neuronal plasticity. *Science* 270:593–598
- Minichiello L, Klein R 1996 TrkB and TrkC neurotrophin receptors cooperate in promoting survival of hippocampal and cerebellar granule neurons. *Genes Dev* 10:2849–2858
- Fagan AM, Suhr ST, Lucidi-Phillipi CA, Peterson DA, Holtzman DM, Gage FH 1997 Endogenous FGF-2 is important for cholinergic sprouting in the denervated hippocampus. *J Neurosci* 17:2499–2511
- Ernfors P, Wetmore C, Olson L, Persson H 1990 Identification of cells in rat brain and peripheral tissue expressing mRNA for members of the nerve growth factor family. *Neuron* 5:511–526
- Wanaka A, Johnson Jr EM, Milbrandt J 1990 Localization of FGF receptor mRNA in the adult rat central nervous system by *in situ* hybridization. *Neuron* 5:267–281
- Kokaia Z, Bengzon J, Metsis M, Kokaia M, Persson H, Lindvall O 1993 Coexpression of neurotrophins and their receptors in neurons of the central nervous system. *Proc Natl Acad Sci USA* 90:6711–6715
- Korsching S 1993 The neurotrophic factor concept: a reexamination. *J Neurosci* 13:2739–2748
- Wetmore C, Olson L 1993 Expression and regulation of neurotrophins and their receptors in hippocampal systems. *Hippocampus* 3:171–182
- Bugra K, Pollard H, Charton G, Moreau J, Ben-Ari Y, Khrestchatsky M 1994 aFGF, bFGF and flg mRNAs show distinct patterns of induction in the hippocampus following kainate-induced seizures. *Eur J Neurosci* 6:58–66
- Lamballe F, Smeyne RJ, Barbacid M 1994 Developmental expression of trkC, the neurotrophin-3 receptor, in the mammalian nervous system. *J Neurosci* 14:14–28
- Joels M, de Kloet ER 1994 Mineralocorticoid and glucocorticoid receptors in the brain. Implications for ion permeability and transmitter systems. *Prog Neurobiol* 43:1–36
- Smith MA 1996 Hippocampal vulnerability to stress and aging: possible role of neurotrophic factors. *Behav Brain Res* 78:25–36
- Lupien S, McEwen BS 1997 The acute effects of corticosteroids on cognition: integration of animal and human model studies. *Brain Res Rev* 24:1–27
- Krozowski ZK, Funder JW 1983 Renal mineralocorticoid receptors and hippocampal corticosterone binding species have intrinsic steroid specificity. *Proc Natl Acad Sci USA* 80:6056–6060
- Reul JM, de Kloet ER 1985 Two receptor systems for corticosterone in rat brain: microdissection and differential occupation. *Endocrinology* 117:2505–2512
- Sapolsky RM, McEwen BS, Rainbow TC 1983 Quantitative autoradiography of [3H] corticosterone receptors in rat brain. *Brain Res* 271:331–334
- Sutanto W, Van Eekelen JAM, Reul JM, de Kloet ER 1988 Species-specific topography of corticosteroid receptor types in rat and hamster brain. *Neuroendocrinology* 47:398–404
- Herman JP, Patel PD, Akil H, Watson SJ 1989 Localization and regulation of glucocorticoid and mineralocorticoid receptor messenger RNAs in the hippocampal formation of the rat. *Mol Endocrinol* 3:1886–1894
- Reul JM, Van den Bosch FR, de Kloet ER 1987 Relative occupation of type-I and type-II corticosteroid receptors in rat brain following stress and dexamethasone treatment: functional implications. *J Endocrinol* 115:459–467
- Sutanto W, de Kloet ER 1987 Species-specificity of corticosteroid receptor in hamster and rat brains. *Endocrinology* 121:1405–1411
- Fuxe K, Wikstrom A-C, Okret S, Agnati LF, Harfstrand A, Yu Z-Y, Granholm L, Zoli M, Vale W, Gustafsson J-A 1985 Mapping of glucocorticoid receptor immunoreactive neurons in the rat tel- and diencephalon using a monoclonal antibody against rat liver glucocorticoid receptor. *Endocrinology* 117:1803–1812
- DeGraan PNE, van Hooff COM, Tilly BC, Oestreicher AB, Schotman P, Gispen WH 1985 Phosphoprotein B-50 in nerve growth cones from fetal rat brain. *Neurosci Lett* 61:235–241
- Nelson RB, Routtenberg A 1985 Characterization of protein F1 (47 kDa, 4.5 pI): a kinase C substrate directly related to neural plasticity. *Exp Neurol* 89:213–224
- Goslin K, Schreyer DJ, Skene JHP, Banker G 1988 Development of neuronal polarity: GAP-43 distinguishes axonal from dendritic growth cones. *Nature* 336:672–674
- Chao HM, Ma LY, McEwen BS, Sakai RR 1998 Regulation of glucocorticoid receptor and mineralocorticoid receptor mRNAs by selective agonists in the rat hippocampus. *Endocrinology* 139:1810–1814
- Friedman WJ, Olson L, Persson H 1991 Cells that express brain-derived neurotrophic factor mRNA in the developing postnatal rat brain. *Eur J Neurosci* 3:688–697
- Ernfors P, Ibanez CF, Ebendal T, Olson L, Persson H 1990 Molecular cloning and neurotrophic activities of a protein with structural similarities to nerve growth factor: developmental and topographical expression in the brain. *Proc Natl Acad Sci USA* 87:5454–5458
- Shimasaki S, Emoto N, Koba A, Mercado M, Shibata F, Cooksey K, Baird A, Ling N 1988 Complementary DNA cloning and sequencing of rat ovarian basic fibroblast growth factor and tissue distribution study of its mRNA. *Biochem Biophys Res Commun* 157:256–263
- Karns LR, Ng S-C, Freeman JA, Fishman MC 1987 Cloning of complementary DNA for GAP-43, a neuronal growth-related protein. *Science* 236:597–600
- Van Eekelen JAM, Jiang W, de Kloet ER, Bohn MC 1988 Distribution of the mineralocorticoid and the glucocorticoid receptor mRNAs in the rat hippocampus. *J Neurosci Res* 21:88–94
- Van Steensel B, VanBinnendijk EP, Hornsby CD, Van der Voort HTM, Krozowski ZS, de Kloet ER, Van Driel R 1996 Partial colocalization of glucocorticoid and mineralocorticoid receptors in discrete compartments in nuclei of rat hippocampus neurons. *J Cell Sci* 109:787–792
- Gould E, Woolley CS, McEwen BS 1990 Short-term glucocorticoid manipulations affect neuronal morphology and survival in the adult dentate gyrus. *Neuroscience* 37:367–375
- Sapolsky RM, Krey LC, McEwen BS 1985 Prolonged glucocorticoid exposure reduces hippocampal neuron number: implications for aging. *J Neurosci* 5:1222–1227
- Woolley CS, Gould E, McEwen BS 1990 Exposure to excess glucocorticoids alters dendritic morphology of adult hippocampal pyramidal neurons. *Brain Res* 531:225–231
- Barbany G, Persson H 1993 Adrenalectomy attenuates kainic acid-elicited increases of messenger RNAs for neurotrophins and their receptors in the brain. *Neuroscience* 54:909–922

39. **Chao HM, McEwen BS** 1994 Glucocorticoids and the expression of mRNAs for neurotrophins, their receptors and GAP-43 in the rat hippocampus. *Mol Brain Res* 26:271–276
40. **Lauterborn J, Berschauer R, Gall C** 1995 Cell-specific modulation of basal and seizure-induced neurotrophin expression by adrenalectomy. *Neuroscience* 68:363–378
41. **Riva MA, Fumagalli F, Blom JMC, Donati E, Racagni G** 1995 Adrenalectomy reduces FGF-1 and FGF-2 gene expression in specific rat brain regions and differently affects their induction by seizures. *Mol Brain Res* 34:190–196
42. **Smith MA, Makino S, Kvetnansky R, Post RM** 1995 Stress and glucocorticoids affect the expression of brain-derived neurotrophic factor and neurotrophin-3 mRNAs in the hippocampus. *J Neurosci* 15:1768–1777
43. **Sloviter RS** 1991 Calcium-binding protein (calbindin-D<sub>28K</sub>) and parvalbumin immunocytochemistry in the normal and epileptic human hippocampus. *J Comp Neurol* 308:381–396
44. **Williamson A, Spencer DD** 1994 Electrophysiological characterization of CA2 pyramidal cells from epileptic humans. *Hippocampus* 4:226–237
45. **Landfield PW, Baskin RK, Pitler TA** 1981 Brain aging correlates: retardation by hormonal-pharmacological treatments. *Science* 214:581–584
46. **Sapolsky RM, Pulsinelli WA** 1985 Glucocorticoids potentiate ischemic injury to neurons: therapeutic implications. *Science* 229:1397–1400
47. **Pavrides C, Watanabe Y, McEwen BS** 1993 Effects of glucocorticoids on hippocampal long-term potentiation. *Hippocampus* 3:183–192
48. **Korte M, Carroll P, Wolf E, Brem G, Thoenen H, Bonhoeffer T** 1995 Hippocampal long-term potentiation is impaired in mice lacking brain-derived neurotrophic factor. *Proc Natl Acad Sci USA* 92:8856–8860
49. **Korte M, Griesbeck O, Gravel C, Carroll P, Staiger V, Thoenen H, Bonhoeffer T** 1996 Virus-mediated gene transfer into hippocampal CA1 region restores long-term potentiation in brain-derived neurotrophic factor mutant mice. *Proc Natl Acad Sci USA* 93:12547–12552

---

### Erratum

In the article, “ROR $\alpha$  gene expression in the perinatal rat cerebellum: ontogeny and thyroid hormone regulation,” by Noriyuki Koibuchi and William W. Chin (*Endocrinology* 139: 2335–2341, 1998), parts of Fig. 6 were incorrectly labeled (page 2340): Fig. 6F should be 6E, and 6E should be 6F.
